# Supplementary material for: Freshwater clam extract reduces liver injury by lowering cholesterol accumulation, improving dysregulated cholesterol synthesis and alleviating inflammation in high-fat, high-cholesterol and cholic acid diet-induced steatohepatitis in mice
Source: Royal Society of Chemistry journal article supplement (doi:10.1039/c8fo00851e), 2018-01-01
Supplement: c8fo00851e1.pdf [file c8fo00851e1.pdf]

### 1. Improve dysregulated cholesterol synthesis

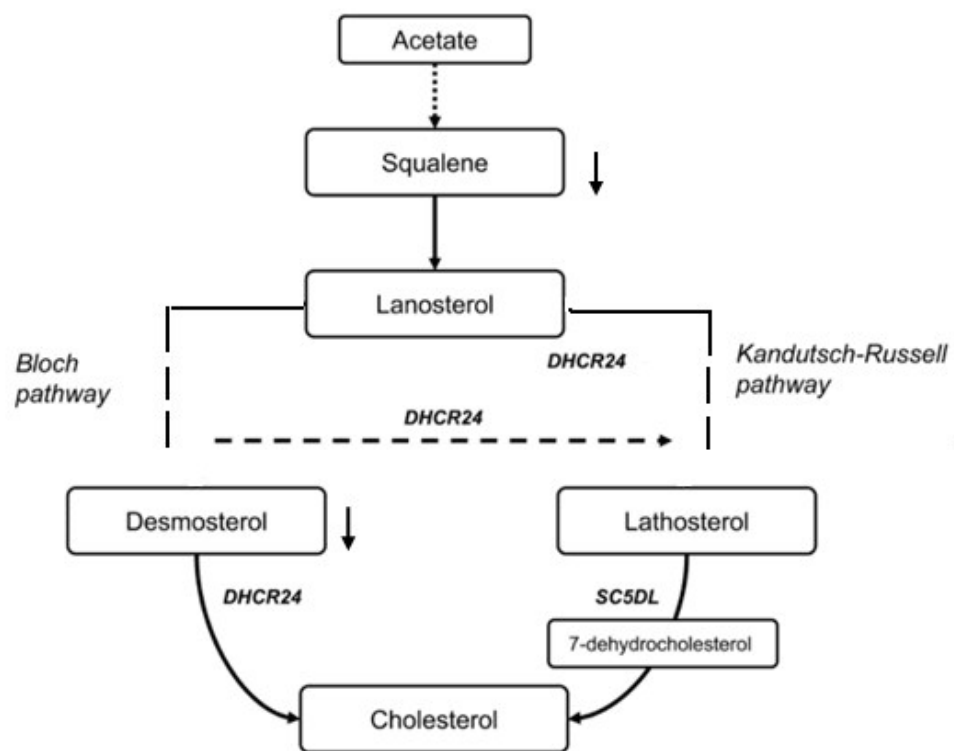

### 2. Reduce cholesterol-induced NLRP3 activation and activate caspase-1 and IL-1 $\beta$

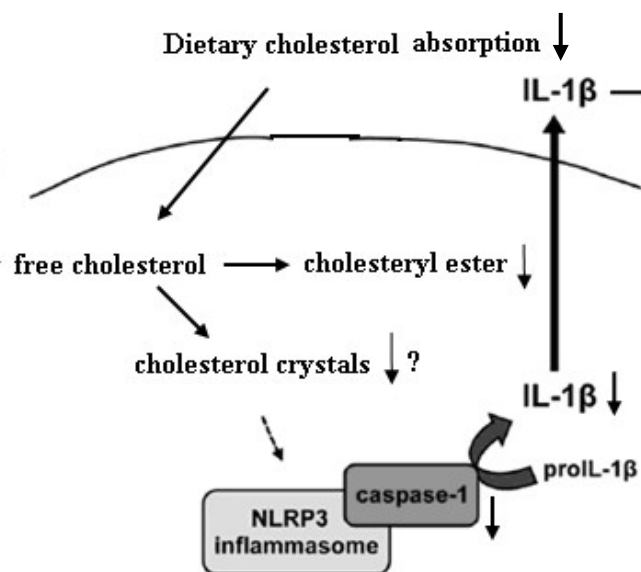

**Supplementary data 1.** FCE improved dysregulated cholesterol synthesis pathway (1) and suppressed cholesterol-induced NLRP3 inflammasome activation (2) in liver. In this study, FCE reduced squalene and desmosterol accumulations in liver, suggesting cholesterol synthesis pathway was dysregulated. 24-Dehydrocholesterol reductase (DHCR24) is the enzyme that catalyze the formation of cholesterol from desmosterol. In addition, FCE reduced dietary cholesterol absorption and liver total cholesterol, especially cholesteryl ester, and might reduce cholesterol crystals-induced NLRP3 activation and liver inflammation.

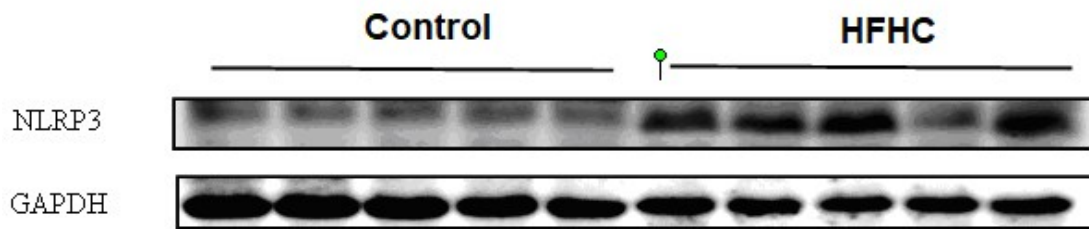

### Supplementary data 2.

Mice fed the HFHC diet induced NLRP3 protein expression compared with low-fat control diet (the same diet composition in this study).

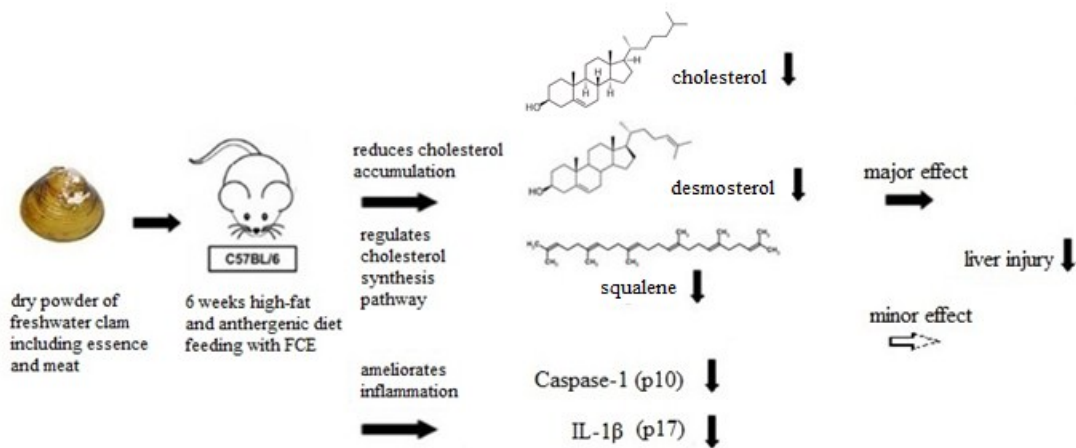

### Supplementary data 3.

Graphic abstract of this study.
